# Supplementary material for: Aconitase Regulation of Erythropoiesis Correlates with a Novel Licensing Function in Erythropoietin-Induced ERK Signaling
Source: PLoS One. 2011 Aug 22;6(8):e23850. doi: 10.1371/journal.pone.0023850 (PMC3161794; doi:10.1371/journal.pone.0023850)
Supplement: Table S2 — CBC parameters of PV mice treated for four weeks with saline (0.9%) or FA (2 mg/kg/day). (DOC) [file pone.0023850.s009.doc]

**Table S2.**  CBC parameters of PV mice treated for four weeks with saline (0.9%) or FA (2 mg/kg/day).

| **Blood parameter** | **Saline**  **(n = 3)** | **FA-treated**  **(n = 10)** | ***P***  **value** |
| --- | --- | --- | --- |
| **RBC, x 106/L** | 9.16  0.25 | 7.73  0.54 | .002* |
| **Hematocrit, %** | 38.20  2.20 | 35.41  1.83 | .037* |
| **Hemoglobin, g/dL** | 13.53  0.57 | 12.59  0.72 | .068 |
| **MCHC, g/dL** | 35.47  0.67 | 35.93  3.0 | .8 |
| **MCV, fL** | 40.2  1.04 | 45.52  1.56 | .0003* |
| **Platelets, x 103/L** | 1841  672 | 1785  416 | .86 |
| **Neutrophils, x 103/L** | 1.43  0.41 | 3.91  2.42 | .25 |
| **Lymphocytes, x 103/L** | 5.11  0.17 | 6.97  3.17 | .35 |

Data are presented as mean  SD.

* indicate values that are significantly different from saline-

treated mice.
